# Supplementary material
Source: PubMed Central journal article supplement (PMC3069759)
Supplement: JCI42040sd.pdf [file JCI42040sd.pdf]

## Supplemental Figure 1

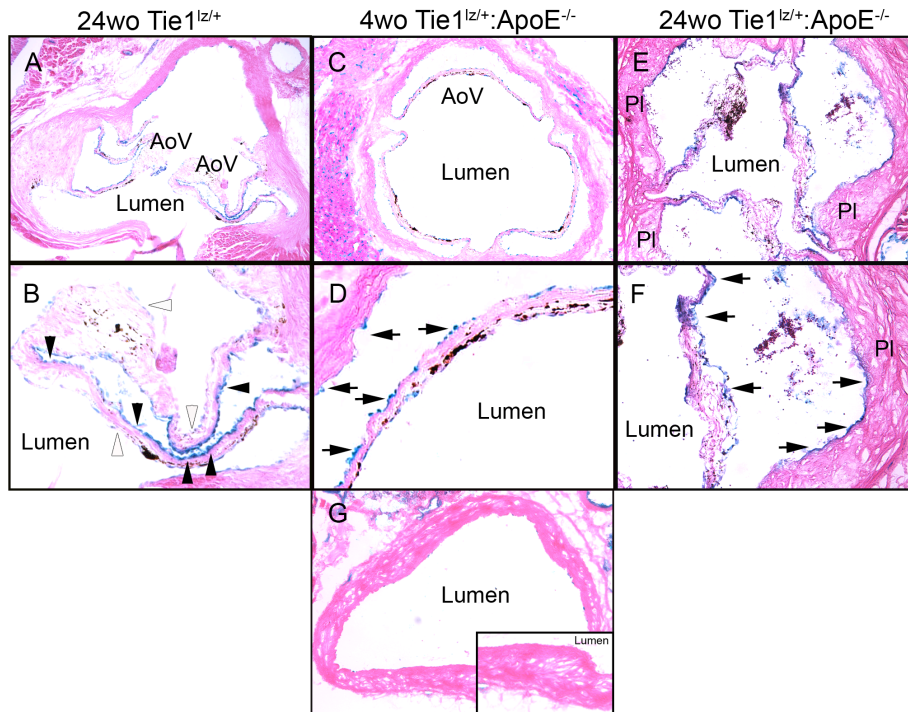

### Supplemental Figure 1

#### **Tie1 is Expressed in Regions of Disturbed Flow**

(A-G) Cryosections of aortic valves from Tie1-LacZ mice, X-gal stained and H&E counterstained. (A) 24 week-old Tie1<sup>LacZ/+</sup> mouse aortic valves shown in high magnification (B), illustrating specific X-gal staining on fibrosa surface of aortic valve leaflet (black arrowheads) but not on ventricularis surface (white arrowheads). Tie1-LacZ expression (black arrows) persists on the fibrosa surface of the aortic valve leaflet and aortic wall of Tie1<sup>LacZ/+</sup>:ApoE<sup>-/-</sup> mouse, prior to atherosclerotic lesion formation at (C) 4 weeks, (D) high magnification and during advanced disease progression at (E) 24 weeks, (F) high magnification. (G) Cryosection of ascending aorta (immediately downstream of aortic valves) depicting absence of endothelial LacZ staining where laminar flow is predominant (inset, higher magnification of aorta wall and endothelium). (A,C,E,G – 50x magnification; B,D,F – 100x magnification; AoV, aortic valve leaflets; Pl, atherosclerotic plaques).

## Supplemental Figure 2

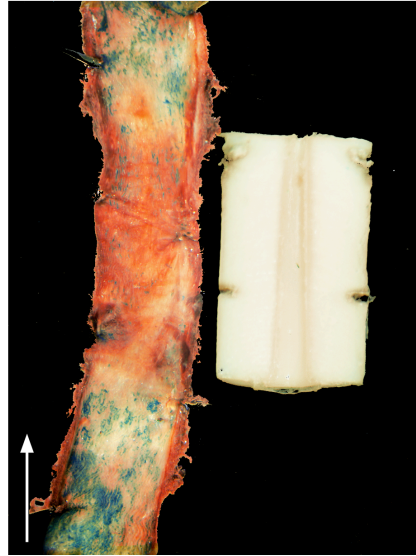

### **Supplemental Figure 2**

#### **Endothelial Immunostaining in Cast Implanted Carotid Artery**

Carotid artery that was implanted with the cast was first processed for X-gal staining. Subsequently the artery was counterstained with VECadherin antibody and developed with DAB (region of staining was pseudo-colored to red; white arrow indicates direction of blood flow).

### Supplemental Figure 3

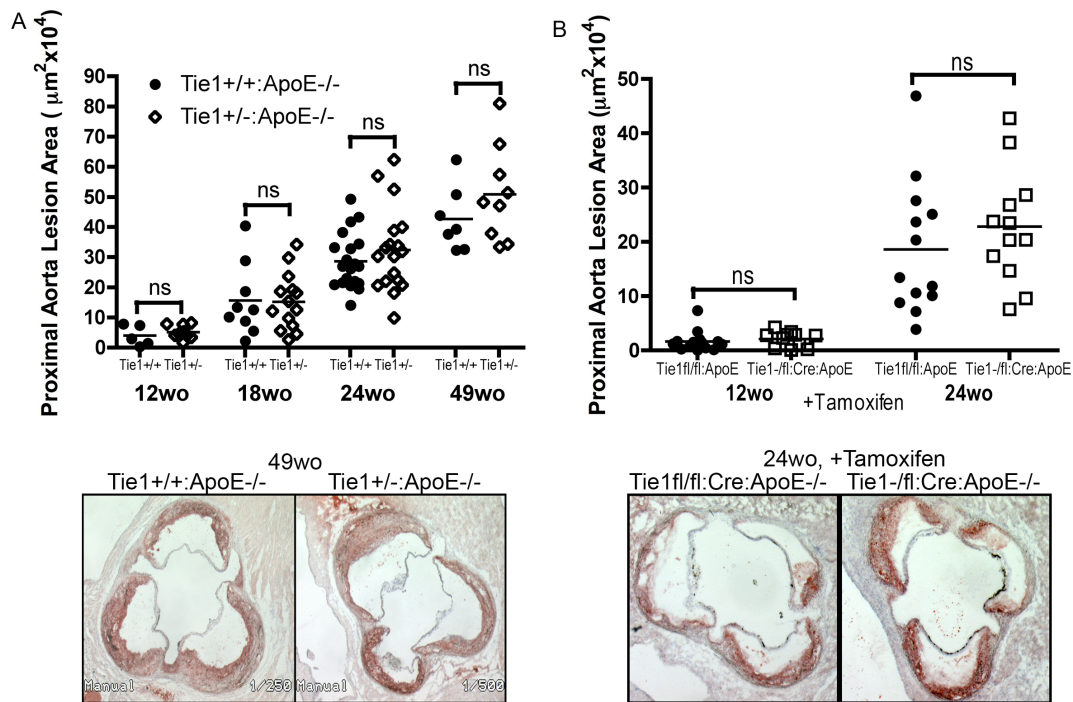

### Supplemental Figure 3

#### Tie1 Reduction Does Not Alter Atherosclerosis in the Aortic Valves

(A) Graphical analyses of atherosclerosis in aortic sinuses of Tie1<sup>+/+</sup>:ApoE<sup>-/-</sup> vs. Tie1<sup>+/-</sup>:ApoE<sup>-/-</sup> mice at 12, 18, 24 and 49 weeks. (12 week-old: 40030±15311µm<sup>2</sup> vs. 51719±6094µm<sup>2</sup>; 18 week-old: 156155±40275µm<sup>2</sup> vs. 152210±25157µm<sup>2</sup>; 24 week-old: 286433±16160µm<sup>2</sup> vs. 334760±41861µm<sup>2</sup>; 49 week-old: 426680±40877µm<sup>2</sup> vs. 529025±52711µm<sup>2</sup>). Representative images of oil red o stained aortic sinuses from 49 week-old Tie1<sup>+/+</sup>:ApoE<sup>-/-</sup> and Tie1<sup>+/-</sup>:ApoE<sup>-/-</sup> mice. (B) Graphical analyses of atherosclerosis in aortic sinuses of Tie1<sup>fl/fl</sup>:ApoE<sup>-/-</sup> vs. Tie1<sup>-/fl</sup>:SCL-ER<sup>T</sup>-Cre:ApoE<sup>-/-</sup> tamoxifen treated mice (12 week-old: 16607 ± 5004 vs. 21126 ± 4274 µm<sup>2</sup>, NS ; 24 week-old: 22816 ± 3019 vs. 18587 ± 33856 µm<sup>2</sup>, NS). Data points denote individual animals and horizontal bars indicate group average. Representative images of oil red o stained aortic sinuses from 24 week-old tamoxifen treated Tie1<sup>-/fl</sup>:SCL-ER<sup>T</sup>-Cre:ApoE<sup>-/-</sup> vs. Tie1<sup>fl/fl</sup>:ApoE<sup>-/-</sup> mice.

## Supplemental Figure 4

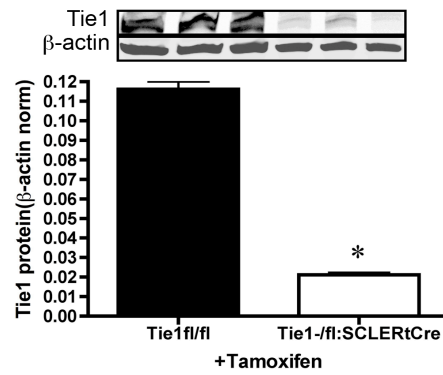

### Supplemental Figure 4

#### Western blot Analysis of Pulmonary Tie1

Graphical analyses of Tie1 levels from tamoxifen treated Tie1<sup>-fllox</sup>:SCL-ER<sup>T</sup>-Cre mice (0.116 ± 0.003 vs. 0.0211 ± 0.001, 81% reduction, n=6, \*p<0.0001).

## Supplemental Figure 5

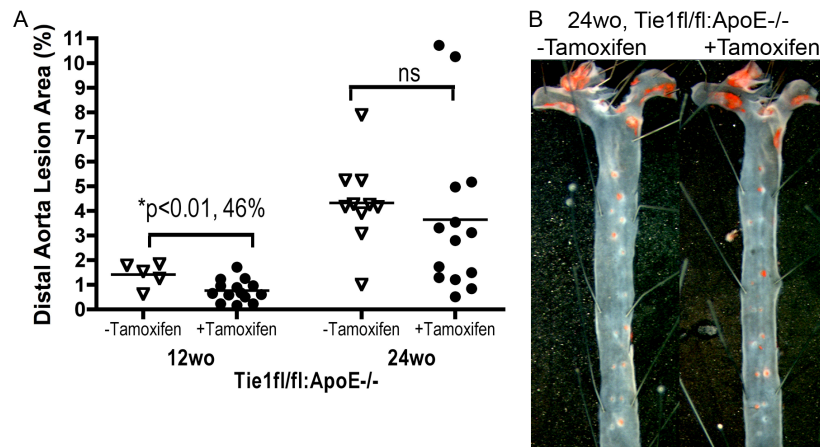

### Supplemental Figure 5

#### Tamoxifen Treatment Temporarily Reduces Atherosclerosis in the Short Term

(A) Comparisons of atherosclerosis burden in untreated and tamoxifen treated

Tie1<sup>flox/flox</sup>:ApoE<sup>-/-</sup> mice 4 weeks post treatment (12 week-old: 1.41 ± 0.22% vs. 0.76 ± 0.11%, p<0.01,) and 16 weeks post treatment (24 week-old: 4.32 ± 0.54% vs. 3.64 ± 0.86%, NS). Data points denote individual animals and horizontal bars indicate group average. (B) Representative images of Sudan IV stained distal aortas from 24 week-old Tie1<sup>flox/flox</sup>:ApoE<sup>-/-</sup> untreated and tamoxifen treated mice.

## Supplemental Figure 6

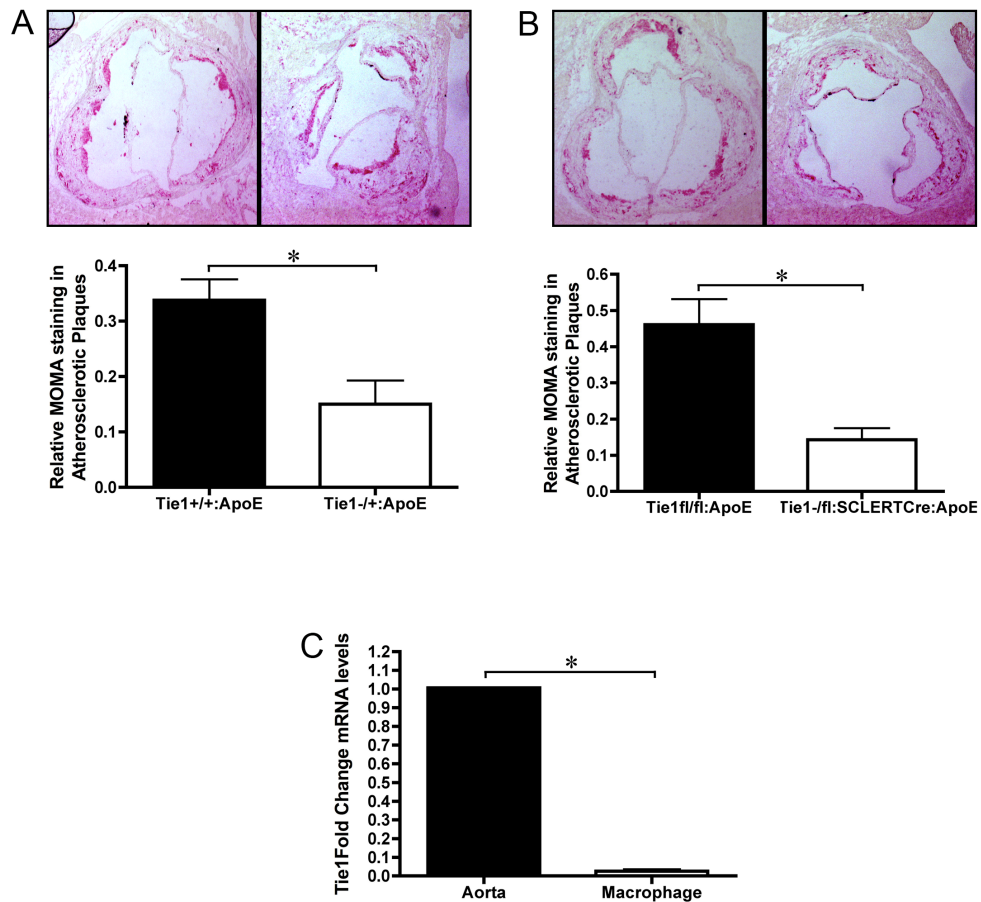

### Supplemental Figure 6

#### **Tie1 is Not Expressed in Macrophages and Tie1 Deletion Reduces Macrophage Infiltration**

Representative images of cryosections from proximal aorta were stained with macrophage antibody (MOMA) and compared between (A) Tie1<sup>+/+</sup>:ApoE<sup>-/-</sup> vs. Tie1<sup>-/-</sup>:ApoE<sup>-/-</sup> (56% reduction, 0.33 ± 0.03 units vs. 0.07 ± 0.44 units, n=3, p<0.01) and (B) Tie1<sup>fl/fl</sup>:ApoE<sup>-/-</sup> vs. Tie1<sup>-/-fl</sup>:SCL-ER<sup>T</sup>-Cre:ApoE<sup>-/-</sup> (70% reduction, 0.46±0.07 units vs. 0.14 ± 0.03 units, n=3, p<0.05). (C) Semi-quantitative RT-PCR analysis of Tie1 mRNA in primary mouse macrophages (n=5, p<0.0001).

## Supplemental Figure 7

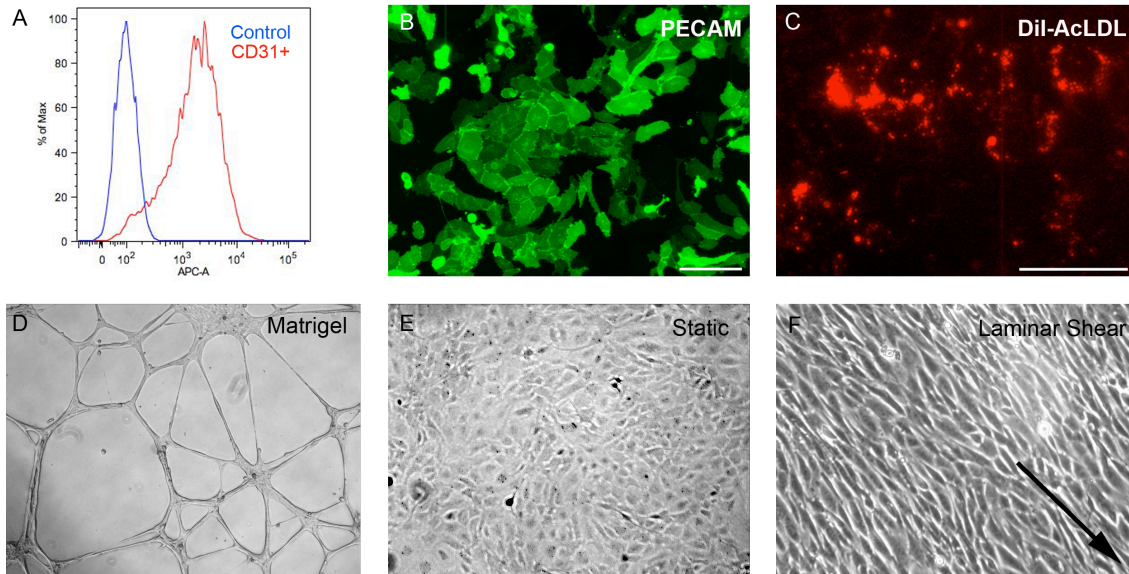

### Supplemental Figure 7

#### Characterization of Murine Aortic Endothelial Cells

(A) Flow cytometry analysis of mouse aortic endothelial cell, 89.7% CD31+. (B) Representative photomicrograph of PECAM immunostained mouse aortic endothelial cells showing uniform cytoplasmic staining in individual cells and localization of PECAM to the cell border when in apposition with adjacent cells. (C) Representative image of DiI-AcLDL uptake *in vitro*. (D) Light microscopy images displaying network formation after 24 hours of culture on matrigel. (E) Phase contrast microscopy photographs illustrating cobblestone morphology. (F) Representative image showing alignment of mouse aortic endothelial cells to direction of flow after 24 hours 20 dynes/cm<sup>2</sup> laminar shear. (White bar represents 100µm scale)

## Supplemental Figure 8

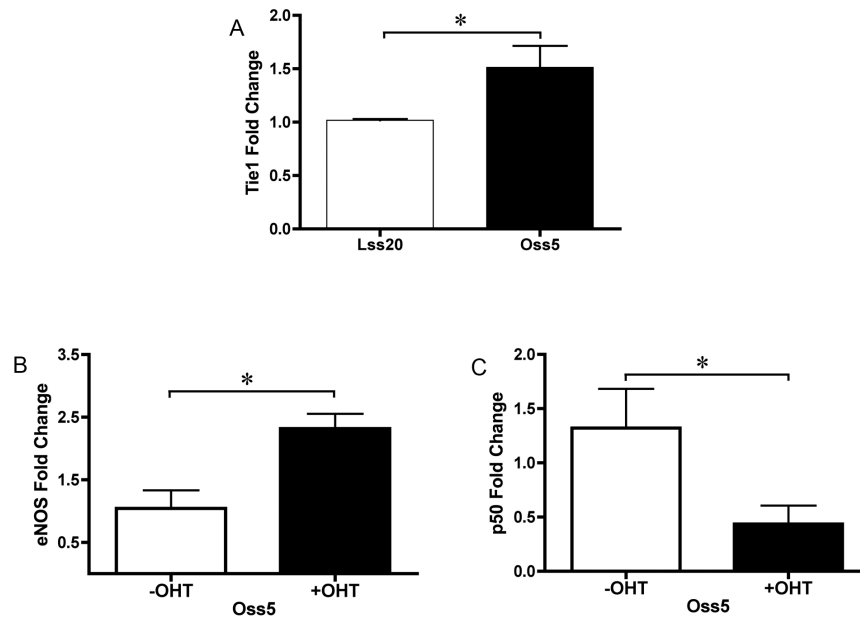

### Supplemental Figure 8

#### Oscillatory Flow Increases Tie1 Expression and Tie1 Deletion Mediates Oscillatory Flow Induced eNOS Expression and p50 Activity

(A) Graphical representation of western blot analysis of relative Tie1 protein levels in wildtype mouse aortic endothelial cells under laminar flow or oscillatory flow. (B, C) Graphical representation of western blot analyses of eNOS protein expression and p50 nuclear translocation in 4OHT treated (+OHT) and untreated (-OHT), Tie1<sup>flax/flax</sup>:SCL-ER<sup>T</sup>-Cre mouse aortic endothelial cells in 24 hours of oscillatory flow. (n=4, p<0.05; Lss20, laminar flow 20 dynes/cm<sup>2</sup>; Oss5, oscillatory flow 5 dynes/cm<sup>2</sup>)
